# Supplementary material
Source: publisher site journal article supplement (https://www.dovepress.com/article/422083)
Supplement: Supplementary file 1 [file get_supplementary_file.php]

**Supplementary Table 1. The primers used in MassArray for SNP genotyping**

| Genes | SNPs | Primer Sequence | | |
| --- | --- | --- | --- | --- |
| 2nd-PCRP | 1st-PCRP | UEP_SEQ |
| H19 | rs217727 | ACGTTGGATGAGCTCAGCTCTGGGATGATG | ACGTTGGATGGACTCCATCTTCATGGCCAC | GGTGGTCAACCGTCC |
| HOTTIP | rs1859168 | ACGTTGGATGGGTGCACCATAAATCTCAAG | ACGTTGGATGTCCTTAAATGTGGCGCTCTC | ACCATAAATCTCAAGAATTCAG |
| CASC8 | rs10505477 | ACGTTGGATGGTCATGTGTCACCACTTGTC | ACGTTGGATGGTCAATACTGACTTTGCCCC | TCAAACAGGAAGCCTTAA |
| HOTAIR | rs2366152 | ACGTTGGATGCTGTGTGTGTACTAAATAC | ACGTTGGATGCCTCCTGCTATTAAGATTGC | gttTGTGTACTAAATACATTGAAATTGC |

**Supplementary Table 2. PCR component and protocol**

|  | Component | Protocol | | |
| --- | --- | --- | --- | --- |
| PCR | 4 μl PCR master mix  1 μl Template DNA | Step Ⅰ | 94 ℃ | 5 min |
| Step Ⅱ | 94 ℃ | 20 s |
| Step Ⅲ | 56°C | 30 s |
| Step Ⅳ | 72°C | 1 min |
| Go to step Ⅱ | | 34 cycle |
| Step Ⅴ | 72 °C | 3 min |
|  |  |  |  |  |
| Remove dNTPs | Add 2 μl Shrimp Alkaline Phosphatase (SAP) | Step Ⅰ | 37 ℃ | 20 min |
| Step Ⅱ | 85 ℃ | 5 min |
|  |  |  |  |  |
| Single base extension | Add 2 μl EXTEND Mix | Step Ⅰ | 94 °C | 30 s |
| Step Ⅱ | 94 °C | 5 s |
| Step Ⅲ | 52 °C | 5 s |
| Step Ⅳ | 80 °C | 5 s |
| Go to step Ⅲ | | 4 cycle |
| Go to step Ⅱ | | 39 cycle |
| Step Ⅴ | 72 °C | 3 min |

**Supplementary table 3. The Hardy–weinberg equilibrium significance tests of the four lncRNA SNPs selected in the current study.**

| SNPs | Genotypes n (%) | | | HWE (*P* value) |
| --- | --- | --- | --- | --- |
| rs217727 | G/G | G/A | A/A |  |
| Control | 317(45.0) | 319(45.3) | 68(9.6) | 0.342 |
| CIN | 120(43.7) | 115(41.9) | 39(14.2) | 0.184 |
| CC | 160(35.7) | 228(50.8) | 60(13.3) | 0.132 |
| rs1859168 | A/A | A/C | C/C |  |
| Control | 133(18.8) | 369(52.4) | 202(28.6) | 0.121 |
| CIN | 48(17.5) | 152(55.4) | 74(27.0) | 0.047 |
| CC | 78(17.4) | 221(49.3) | 149(33.2) | 0.799 |
| rs10505477 | A/A | A/G | G/G |  |
| Control | 105(14.9) | 363(51.5) | 236(33.5) | 0.070 |
| CIN | 52(18.9) | 136(49.6) | 86(31.3) | 0.892 |
| CC | 75(16.7) | 231(51.5) | 142(31.6) | 0.246 |
| rs2366152 | A/A | A/G | G/G |  |
| Control | 486(69.0) | 205(29.1) | 13(1.8) | 0.102 |
| CIN | 189(68.9) | 78(28.4) | 7(2.5) | 0.755 |
| CC | 315(70.3) | 125(27.9) | 8(1.7) | 0.270 |

**Supplementary table 4. The allelic distribution of SNPs between different stages and control groups**

| SNPs | Alleles | control (n=704) | SCC Ⅰ (n=204) | SCC Ⅱ (n=150) | SCC Ⅲ and Ⅳ (n=25) | SCC Ⅰ vs. control | | SCC Ⅱ vs. control | | SCC Ⅲ and Ⅳ vs. control | |
| --- | --- | --- | --- | --- | --- | --- | --- | --- | --- | --- | --- |
| (n, %) | (n, %) | (n, %) | (n, %) | *P* value | OR (95% CI) | *P* value | OR (95% CI) | *P* value | OR (95% CI) |
| rs217727 | G | 953(67.6) | 250(61.2) | 184(61.3) | 29(58.0) | 0.015 | 1.32(1.05~1.66) | 0.034 | 1.32(1.02~1.71) | 0.151 | 1.52(0.86~2.69) |
| A | 455(32.3) | 158(38.7) | 116(38.6) | 21(42.0) |
| rs1859168 | A | 635(45.0) | 190(46.5) | 109(36.3) | 17(34.0) | 0.599 | 1.06(0.85~1.32) | 0.005 | 0.69(0.54~0.90) | 0.120 | 0.68(0.35~1.14) |
| C | 773(54.9) | 218(53.4) | 191(63.6) | 33(66.0) |
| rs10505477 | A | 573(40.6) | 177(43.3) | 111(37.0) | 26(52.0) | 0.331 | 1.12(0.89~1.40) | 0.235 | 0.86(0.66~1.11) | 0.110 | 1.58(0.90~2.78) |
| G | 835(59.3) | 231(56.6) | 189(63.0) | 24(48.0) |
| rs2366152 | A | 1177(83.5) | 346(84.8) | 250(83.3) | 46(92.0) | 0.558 | 0.91(0.67~1.24) | 0.912 | 1.02(0.73~1.42) | 0.112 | 0.44(0.16~1.24) |
| G | 231(16.4) | 62(15.1) | 50(16.6) | 4(8.0) |

**Supplementary table 5 Inheritance model analysis of SNPs between different stages of SCC and control groups**

| SNPs | Model | Genotypes | control (n=704) | SCC Ⅰ (n=204) | SCC Ⅱ (n=150) | SCC Ⅲ and Ⅳ (n=25) | SCC Ⅰ vs control | | | | SCC Ⅱ vs control | | | | SCC Ⅲ and Ⅳ vs control | | | |
| --- | --- | --- | --- | --- | --- | --- | --- | --- | --- | --- | --- | --- | --- | --- | --- | --- | --- | --- |
| (n, %) | (n, %) | (n, %) | (n, %) | *P* value | OR (95% CI) | AIC | BIC | *P* value | OR (95% CI) | AIC | BIC | *P* value | OR (95% CI) | AIC | BIC |
| rs217727 | Codominant | G/G | 317(45.0) | 77(37.8) | 51(34.0) | 9(36.0) | 0.045 | 1 | 967.3 | 981.7 | 0.044 | 1 | 793.5 | 807.7 | 0.290 | 1 | 221.3 | 235.1 |
| A/G | 319(45.3) | 96(47.1) | 82(54.7) | 11(44.0) | 1.24(0.88-1.74) | 1.60(1.09-2.34) | 1.21(0.50-2.97) |
| A/A | 68(9.7) | 31(15.2) | 17(11.3) | 5(20.0) | 1.88(1.15-3.07) | 1.55(0.85-2.85) | 2.59(0.84-7.97) |
| Dominant | G/G | 317(45.0) | 77(37.8) | 51(34) | 9(36.0) | 0.063 | 1 | 968.0 | 977.7 | 0.012 | 1 | 791.5 | 801.0 | 0.370 | 1 | 221.0 | 230.1 |
| A/G-A/A | 387(55.0) | 127(62.2) | 99(66) | 16(64.0) | 1.35(0.98-1.86) | 1.59(1.10-2.30) | 1.46(0.63-3.34) |
| Recessive | G/G-A/G | 636(90.3) | 173(84.8) | 133(88.7) | 20(80.0) | 0.031 | 1 | 966.8 | 976.4 | 0.540 | 1 | 797.4 | 806.9 | 0.130 | 1 | 219.5 | 228.6 |
| A/A | 68(9.7) | 31(15.2) | 17(11.3) | 5(20.0) | 1.68(1.06-2.65) | 1.20(0.68-2.10) | 2.34(0.85-6.43) |
| Overdominant | G/G-A/A | 385(54.7) | 108(52.9) | 68(45.3) | 14(56.0) | 0.660 | 1 | 971.3 | 980.9 | 0.037 | 1 | 793.4 | 802.9 | 0.900 | 1 | 221.8 | 230.9 |
| A/G | 319(45.3) | 96(47.1) | 82(54.7) | 11(44.0) | 1.07(0.78-1.47) | 1.46(1.02-2.07) | 0.95(0.42-2.12) |
| Log-additive | —— | —— | —— | —— | —— | 0.015 | 1.33(1.06-1.68) | 965.6 | 975.2 | 0.031 | 1.34(1.03-1.76) | 793.1 | 802.6 | 0.150 | 1.54(0.86-2.76) | 219.7 | 228.9 |
| rs1859168 | Codominant | C/C | 202(28.7) | 60(29.4) | 61(40.7) | 9(36.0) | 0.430 | 1 | 971.8 | 986.3 | 0.013 | 1 | 791.1 | 805.3 | 0.086 | 1 | 218.9 | 232.6 |
| C/A | 369(52.4) | 98(48.0) | 69(46.0) | 15(60.0) | 0.89(0.62-1.29) | 0.62(0.42-0.91) | 0.91(0.39-2.12) |
| A/A | 133(18.9) | 46(22.6) | 20(13.3) | 1(4.0) | 1.16(0.75-1.81) | 0.50(0.29-0.86) | 0.17(0.02-1.35) |
| Dominant | C/C | 202(28.7) | 60(29.4) | 61(40.7) | 9(36.0) | 0.840 | 1 | 971.4 | 981.1 | 0.005 | 1 | 789.7 | 799.2 | 0.440 | 1 | 221.2 | 230.4 |
| C/A-A/A | 502(71.3) | 144(70.6) | 89(59.3) | 16(64.0) | 0.97(0.69-1.36) | 0.59(0.41-0.85) | 0.72(0.31-1.65) |
| Recessive | C/C-C/A | 571(81.1) | 158(77.5) | 130(86.7) | 24(96.0) | 0.250 | 1 | 970.2 | 979.8 | 0.097 | 1 | 795.0 | 804.5 | 0.028 | 1 | 216.9 | 226.1 |
| A/A | 133(18.9) | 46(22.6) | 20(13.3) | 1(4.0) | 1.25(0.86-1.83) | 0.66(0.40-1.10) | 0.18 (0.02-1.33) |
| Overdominant | C/C-A/A | 335(47.6) | 106(52.0) | 81(54.0) | 10(40.0) | 0.270 | 1 | 970.3 | 979.9 | 0.150 | 1 | 795.7 | 805.2 | 0.450 | 1 | 221.2 | 230.4 |
| C/A | 369(52.4) | 98(48.0) | 69(46.0) | 15(60.0) | 0.84(0.61-1.15) | 0.77(0.54-1.10) | 1.36(0.60-3.07) |
| Log-additive | —— | —— | —— | —— | —— | 0.590 | 1.06(0.85-1.33) | 971.2 | 980.8 | 0.004 | 0.68(0.52-0.89) | 789.5 | 799.0 | 0.100 | 0.61(0.33-1.12) | 219.1 | 228.3 |
| rs10505477 | Codominant | G/G | 236(33.5) | 59(28.9) | 56(37.3) | 7(28.0) | 0.460 | 1 | 971.9 | 986.4 | 0.430 | 1 | 798.1 | 812.3 | 0.110 | 1 | 219.4 | 233.1 |
| G/A | 363(51.6) | 113(55.4) | 77(51.3) | 10(40.0) | 1.25(0.87-1.78) | 0.89(0.61-1.31) | 0.93(0.35-2.47) |
| A/A | 105(14.9) | 32(15.7) | 17(11.3) | 8(32.0) | 1.22(0.75-1.99) | 0.68(0.38-1.23) | 2.57(0.91-7.27) |
| Dominant | G/G | 236(33.5) | 59(28.9) | 56(37.3) | 7(28.0) | 0.210 | 1 | 969.9 | 979.6 | 0.370 | 1 | 797 | 806.5 | 0.560 | 1 | 221.4 | 230.6 |
| G/A-A/A | 468(66.5) | 145(71.1) | 94(62.7) | 18(72.0) | 1.24(0.88-1.74) | 0.85(0.59-1.22) | 1.30(0.53-3.15) |
| Recessive | G/G-G/A | 599(85.1) | 172(84.3) | 133(88.7) | 17(68.0) | 0.790 | 1 | 971.4 | 981.0 | 0.240 | 1 | 796.4 | 805.9 | 0.036 | 1 | 217.4 | 226.6 |
| A/A | 105(14.9) | 32(15.7) | 17(11.3) | 8(32.0) | 1.06(0.69-1.63) | 0.73(0.42-1.26) | 2.68(1.13-6.38) |
| Overdominant | G/G-A/A | 341(48.4) | 91(44.6) | 73(48.7) | 15(60.0) | 0.330 | 1 | 970.6 | 980.2 | 0.960 | 1 | 797.7 | 807.2 | 0.250 | 1 | 220.5 | 229.7 |
| G/A | 363(51.6) | 113(55.4) | 77(51.3) | 10(40.0) | 1.17(0.85-1.60) | 0.99(0.70-1.41) | 0.63(0.28-1.41) |
| Log-additive | —— | —— | —— | —— | —— | 0.310 | 1.13(0.89-1.42) | 970.5 | 980.1 | 0.220 | 0.85(0.65-1.10) | 796.2 | 805.7 | 0.100 | 1.63(0.91-2.92) | 219.1 | 228.3 |
| rs2366152 | Codominant | A/A | 486(69.0) | 145(71.1) | 104(69.3) | 21(84.0) | 0.830 | 1 | 973.1 | 987.5 | 0.800 | 1 | 799.3 | 813.6 | 0.190 | 1 | 220.4 | 234.2 |
| A/G | 205(29.1) | 56(27.4) | 42(28.0) | 4(16.0) | 0.92(0.65-1.30) | 0.96(0.65-1.42) | 0.45(0.15-1.33) |
| G/G | 13(1.8) | 3(1.5) | 4(2.7) | 0(0.0) | 0.77(0.22-2.75) | 1.44(0.46-4.50) | 0.00(0.00-NA) |
| Dominant | A/A | 486(69.0) | 145(71.1) | 104(69.3) | 21(84.0) | 0.580 | 1 | 971.2 | 980.8 | 0.940 | 1 | 797.7 | 807.2 | 0.090 | 1 | 218.9 | 228.1 |
| A/G-G/G | 218(31.0) | 59(28.9) | 46(30.7) | 4(16.0) | 0.91(0.64-1.28) | 0.99(0.67-1.44) | 0.42(0.14-1.25) |
| Recessive | A/A-A/G | 691(98.2) | 201(98.5) | 146(97.3) | 25(100.0) | 0.710 | 1 | 971.3 | 981.0 | 0.530 | 1 | 797.4 | 806.9 | 0.340 | 1 | 220.9 | 230.0 |
| G/G | 13(1.8) | 3(1.5) | 4(2.7) | 0(0.0) | 0.79(0.22-2.81) | 1.46(0.47-4.53) | 0.00(0.00-NA) |
| Overdominant | A/A-G/G | 499(70.9) | 148(72.5) | 108(72.0) | 21(84.0) | 0.640 | 1 | 971.3 | 980.9 | 0.780 | 1 | 797.7 | 807.2 | 0.130 | 1 | 219.5 | 228.7 |
| A/G | 205(29.1) | 56(27.4) | 42(28.0) | 4(16.0) | 0.92(0.65-1.30) | 0.95(0.64-1.40) | 0.46(0.16-1.37) |
| Log-additive | —— | —— | —— | —— | —— | 0.540 | 0.91(0.66-1.24) | 971.1 | 980.7 | 0.910 | 1.02(0.72-1.44) | 797.7 | 807.2 | 0.076 | 0.43(0.15-1.22) | 218.6 | 227.8 |
